# Supplementary material for: The monoiron anionfac-[Fe(CO)3I3]−and its organic aminium salts: their preparation, CO-release, and cytotoxicity
Source: Royal Society of Chemistry journal article supplement (doi:10.1039/d0nj01182g), 2020-01-01
Supplement: d0nj01182g1.pdf [file d0nj01182g1.pdf]

### Supplementary Information

The monoiron anion, *fac*-[Fe(CO)<sub>3</sub>I<sub>3</sub>]<sup>-</sup> and its organic aminium salts: their preparation, CO-release and cytotoxicity

Xiuqin Yang,<sup>‡a,b</sup> Jing Jin,<sup>‡c</sup> Zhuming Guo,<sup>d</sup> Zhiyin Xiao,<sup>\*a</sup> Naiwen Chen,<sup>c</sup> Xiujuan Jiang,<sup>a</sup> Yi He,<sup>\*c</sup> and Xiaoming Liu<sup>\*a</sup>

<sup>a</sup> College of Biological, Chemical Sciences and Engineering, Jiaxing University, Jiaxing 314001, China

<sup>b</sup> College of Chemistry and Life Sciences, Zhejiang Normal University, Jinhua 321004, China

<sup>c</sup> Department of Urology, The Affiliated Hospital of Jiaxing University, Jiaxing 314001, China

<sup>d</sup> College of Chemistry and Bioengineering, Guilin University of Technology, Guilin, 514006, China

<sup>‡</sup> These authors have equal contribution towards this work.

Email: xiaoming.liu@mail.zjxu.edu.cn (X. Liu); zhiyin.xiao@zjxu.edu.cn (Z. Xiao); heyi@zjxu.edu.cn (Y. He)

Tel./Fax: +86 (0)573 83643937

## Contents

- Figure S1**  $^1\text{H}$  /  $^{13}\text{C}$  NMR spectra of salt **1** in acetone- $d^6$  solvent.
- Figure S2**  $^1\text{H}$  /  $^{13}\text{C}$  NMR spectra of salt **2** in acetone- $d^6$  solvent.
- Figure S3**  $^1\text{H}$  /  $^{13}\text{C}$  NMR spectra of salt **3** in acetone- $d^6$  solvent.
- Figure S4**  $^1\text{H}$  /  $^{13}\text{C}$  NMR spectra of salt **4** in acetone- $d^6$  solvent.
- Figure S5**  $^1\text{H}$  /  $^{13}\text{C}$  NMR spectra of salt **5** in acetone- $d^6$  solvent.
- Figure S6** Mass spectra of salt **1** in MeOH.
- Figure S7** Mass spectra of salt **2** in MeOH.
- Figure S8** Mass spectra of salt **3** in MeOH.
- Figure S9** Mass spectra of salt **4** in MeOH.
- Figure S10** Mass spectra of salt **5** in MeOH.
- Figure S11** Infrared spectral variation during the CO-releasing process of salts **2** (a), **3** (b) and **4** (c), and **5** (d) in DMSO with a concentration of  $8.0 \text{ mmol L}^{-1}$  at  $37 \text{ }^\circ\text{C}$  under an open atmosphere in dark, respectively.
- Figure S12** Plot of rate constant ( $k_{\text{obs}}$ ) of the salts in DMSO against the logarithm of the octanol/water partition coefficient ( $\log P$ ) of the amines.
- Figure S13** Infrared spectral variation during the CO-releasing process of salts **1** (a), **2** (b), **3** (c), **4** (d), and **5** (e) in  $\text{D}_2\text{O}$  with a concentration of  $8.0 \text{ mmol L}^{-1}$  at  $37 \text{ }^\circ\text{C}$  under an open atmosphere in dark, respectively.
- Figure S14** Plots of the vibrational absorption ( $2090 \text{ cm}^{-1}$ ) of salts **1** (a), **2** (b), **3** (c), **4** (d), and **5** (e) against the process time in  $\text{D}_2\text{O}$  solvent (conditions:  $8.0 \text{ mmol L}^{-1}$  /  $37 \text{ }^\circ\text{C}$  / open air / dark).
- Figure S15** UV-vis spectra of TMB in HOAc-NaOAc buffer ( $\text{pH} = 4.5$ ) with the presence of salt **5** under different atmospheres.
- Figure S16** A representative photo of an aqueous solution of salt **5** after adding of a  $\text{CCl}_4$  organic solvent.
- Figure S17** (a) Infrared spectral variation during the CO-releasing process of salt **5** in the present of NaI ( $0.024 \text{ mol L}^{-1}$ ) and (b) plot of the vibrational absorption ( $2090 \text{ cm}^{-1}$ ) of salt **5** against the process time in  $\text{D}_2\text{O}$  solvent.
- Figure S18** (a) Infrared spectral variation during the CO-releasing process of salt **5** in

the present of NaI (0.24 mol L<sup>-1</sup>) and (b) plot of the vibrational absorption (2090 cm<sup>-1</sup>) of salt **5** against the process time in D<sub>2</sub>O solvent.

**Figure S19** (a) Infrared spectral variation during the CO-releasing process of salt **5** in the present of glucose (0.1 mol L<sup>-1</sup>) and (b) plot of the vibrational absorption (2090 cm<sup>-1</sup>) of salt **5** against the process time in D<sub>2</sub>O solvent.

**Figure S20** Infrared spectral variation during the CO-releasing process of salt **5** in D<sub>2</sub>O solvent under N<sub>2</sub> atmosphere in dark.

**Figure S21** Mass spectra of i-CORM's solution of salt **5** in D<sub>2</sub>O solvent.

**Figure S22** nonlinear regression results of viabilities of RT112 against their responded Logarithm of salt's concentration (log *c*) to estimate IC<sub>50</sub> values of **1** (a), **2** (b), **3**(c), **4** (d) and **5** (e) in 24 h, respectively.

**Figure S23** nonlinear regression results of viabilities of RT112 against their responded Logarithm of the i-CORMs' concentration (log *c*) derived from salt **5** to estimate its IC<sub>50</sub> value in 24 h.

**Figure S24** nonlinear regression results of viabilities of SV-HUC-1 against their responded Logarithm of salt's concentration (log *c*) to estimate IC<sub>50</sub> values of **1** (a), **2**(b), **3** (c), **4** (d) and **5** (e) in 24 h, respectively.

**Table S1** Crystal data and structural refinements for salts **1–4**.

**Table S2** Selected bond lengths (Å) and angles (°) for salts **1–4**.

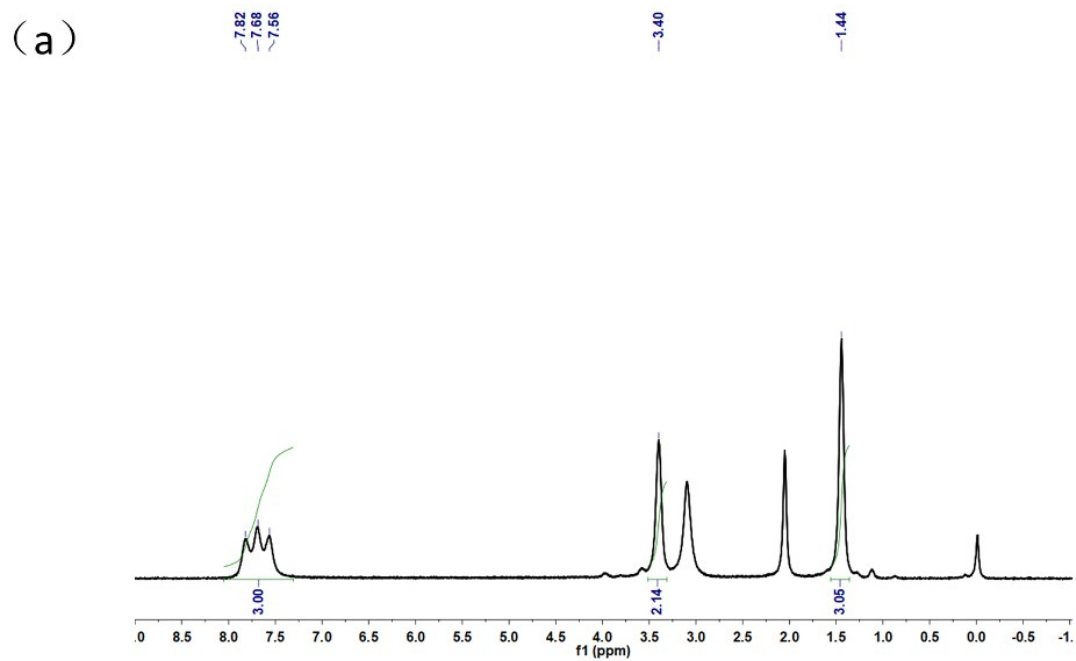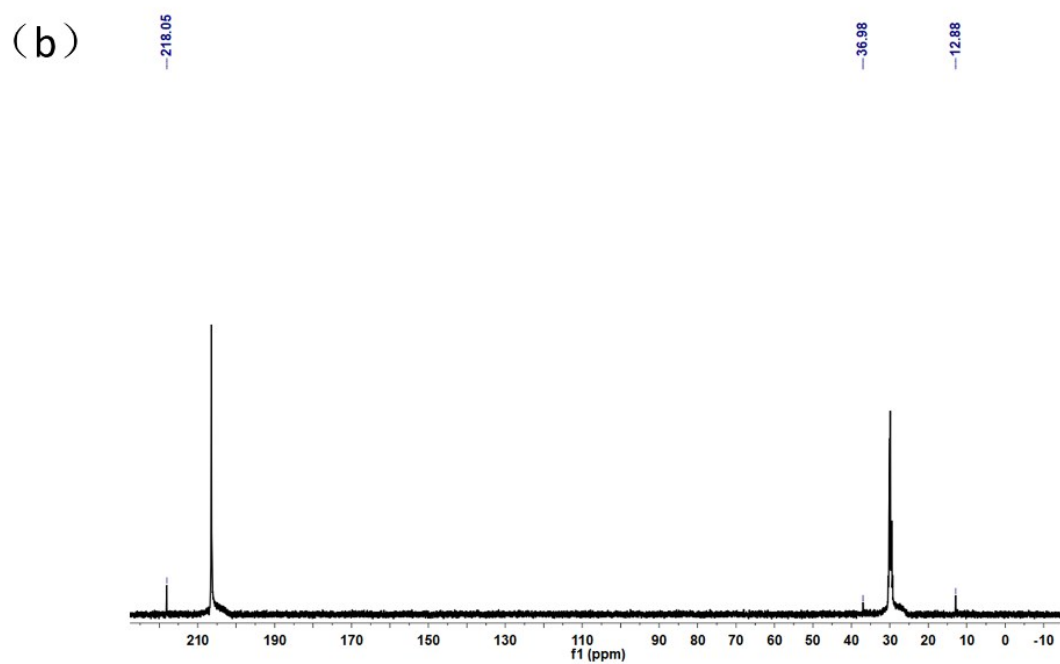

**Figure S1**  $^1\text{H}$  /  $^{13}\text{C}$  NMR spectra of salt **1** in acetone- $d^6$  solvent.

(a)

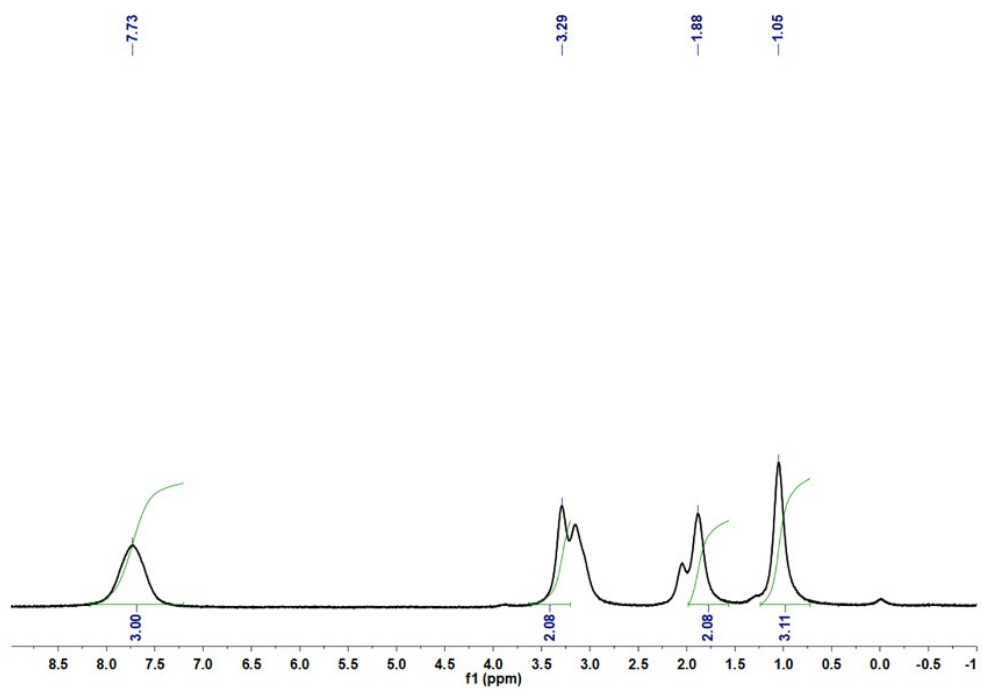

(b)

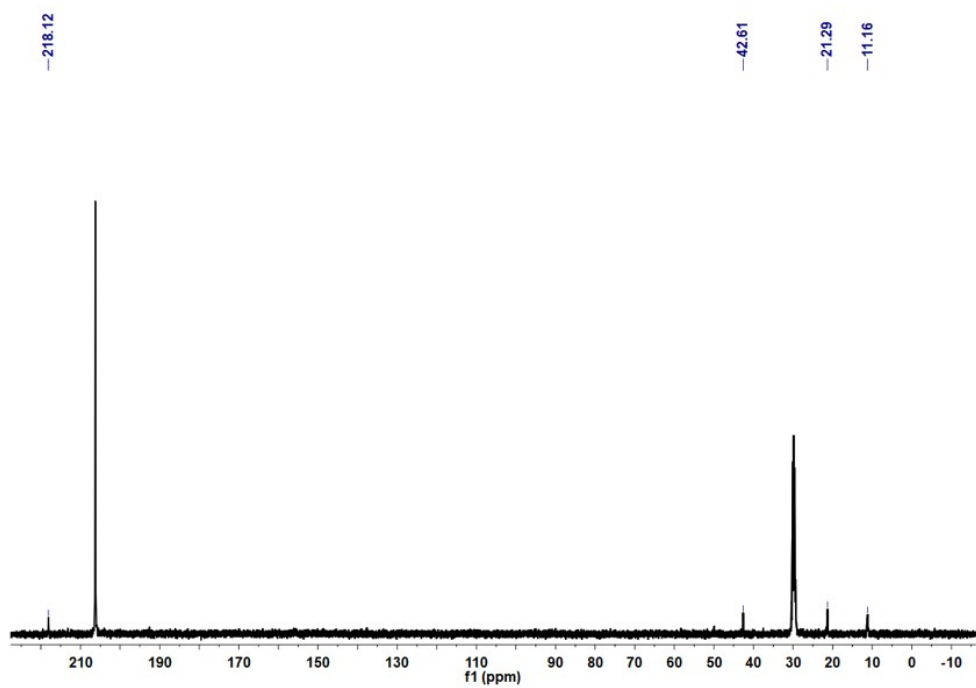

**Figure S2**  $^1\text{H}$  /  $^{13}\text{C}$  NMR spectra of salt **2** in acetone- $d_6$  solvent.

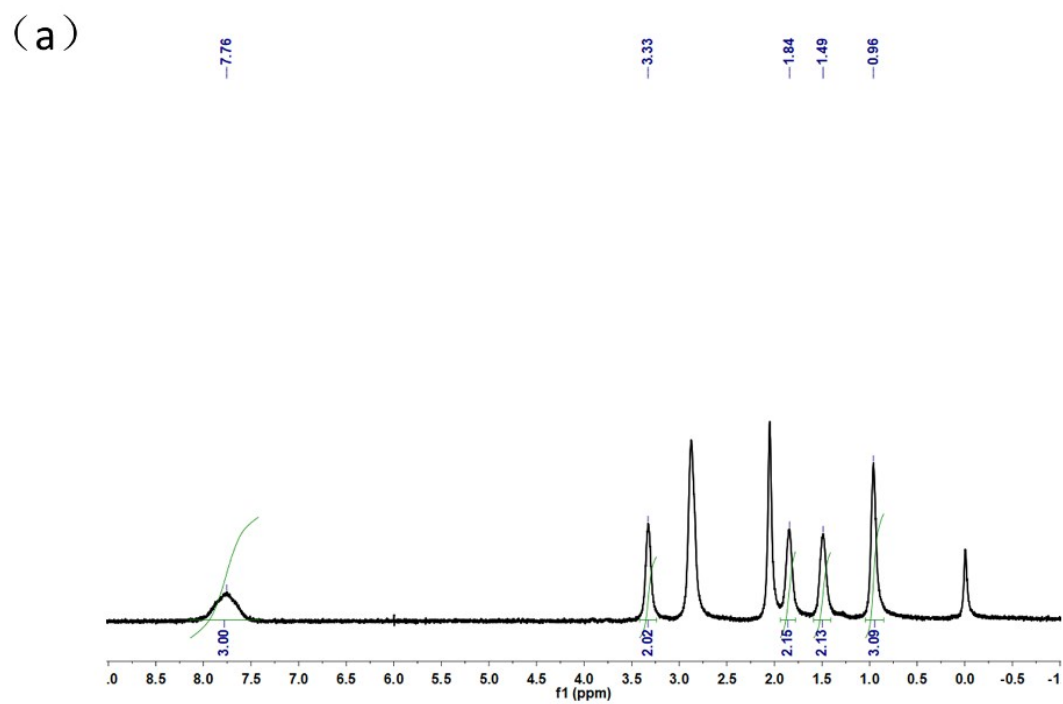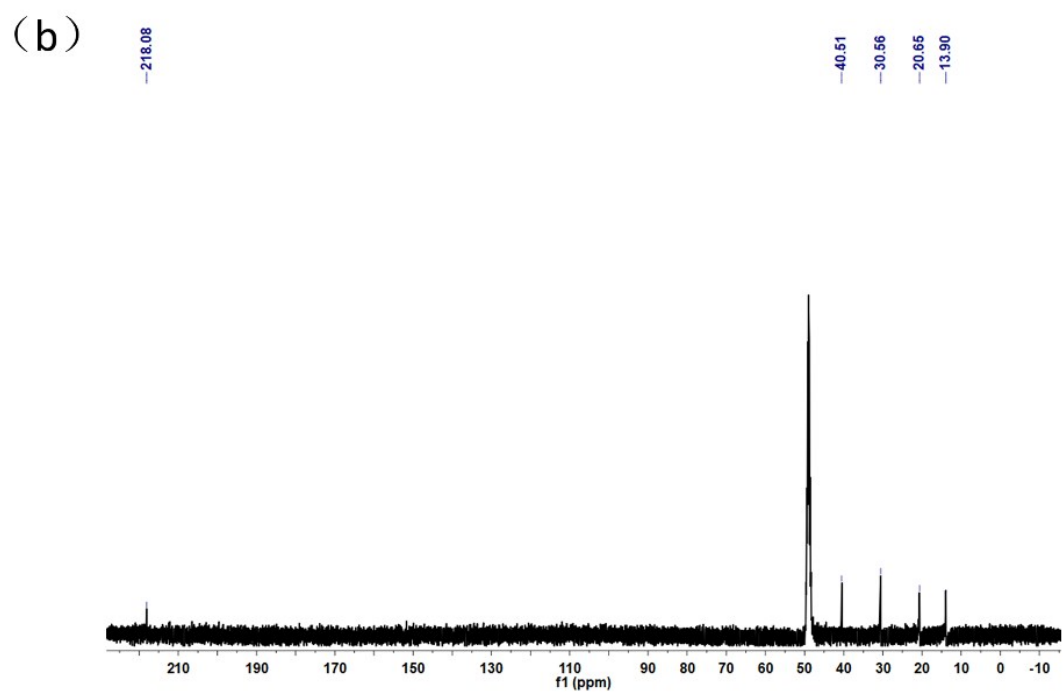

**Figure S3**  $^1\text{H}$  /  $^{13}\text{C}$  NMR spectra of salt **3** in acetone- $d_6$  solvent.

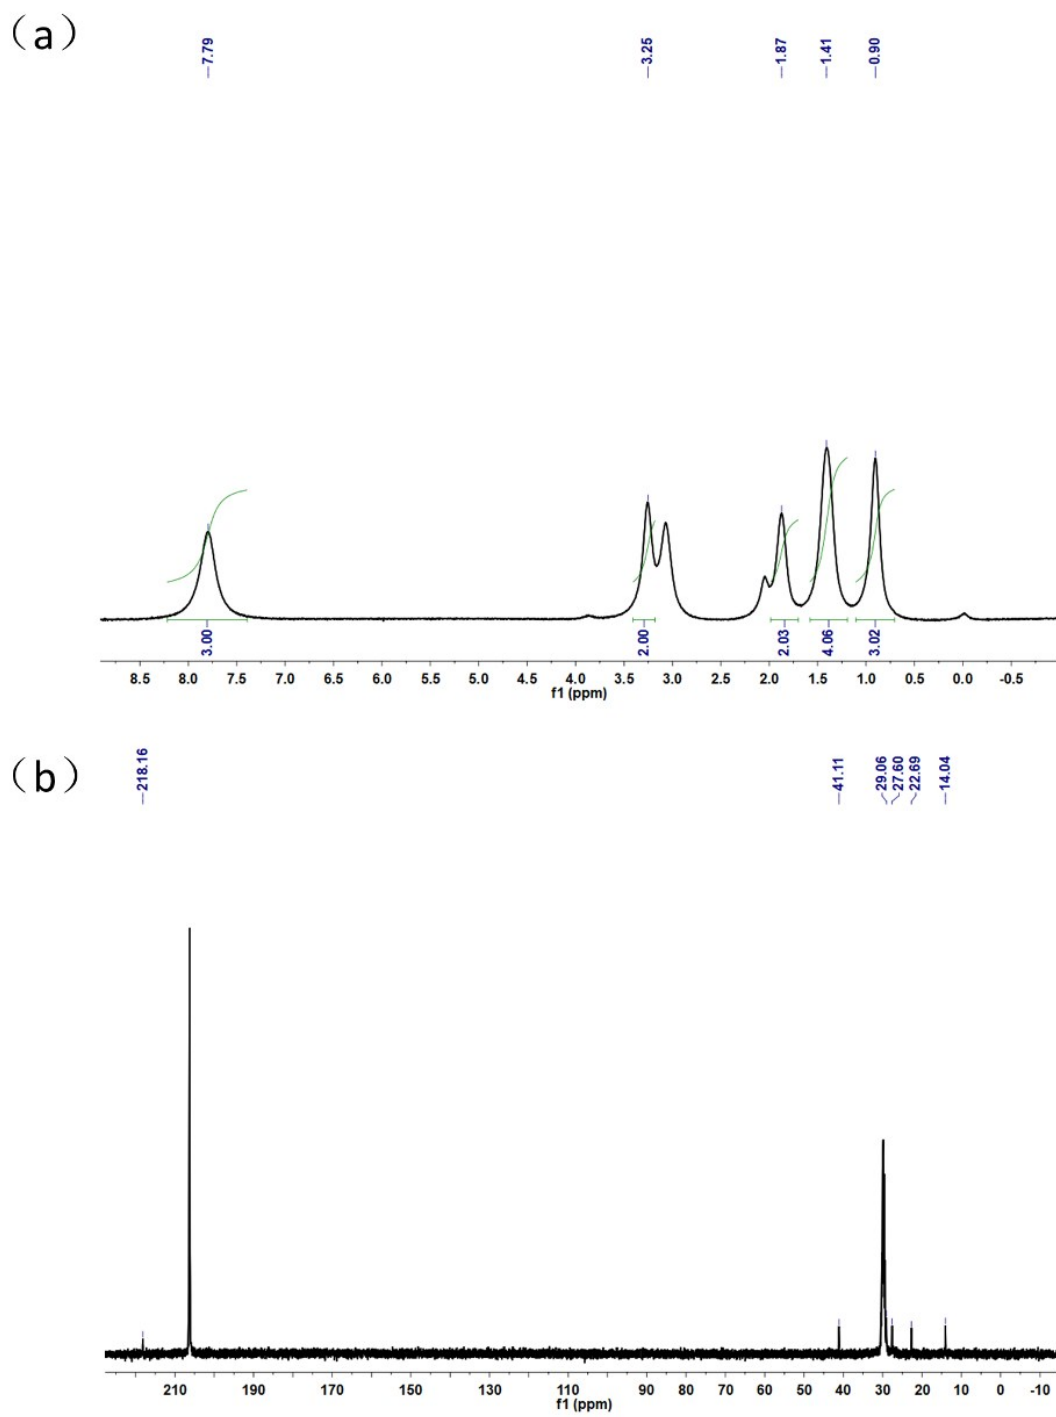

Figure S4  $^1\text{H}$  /  $^{13}\text{C}$  NMR spectra of salt 4 in acetone- $d^6$  solvent.

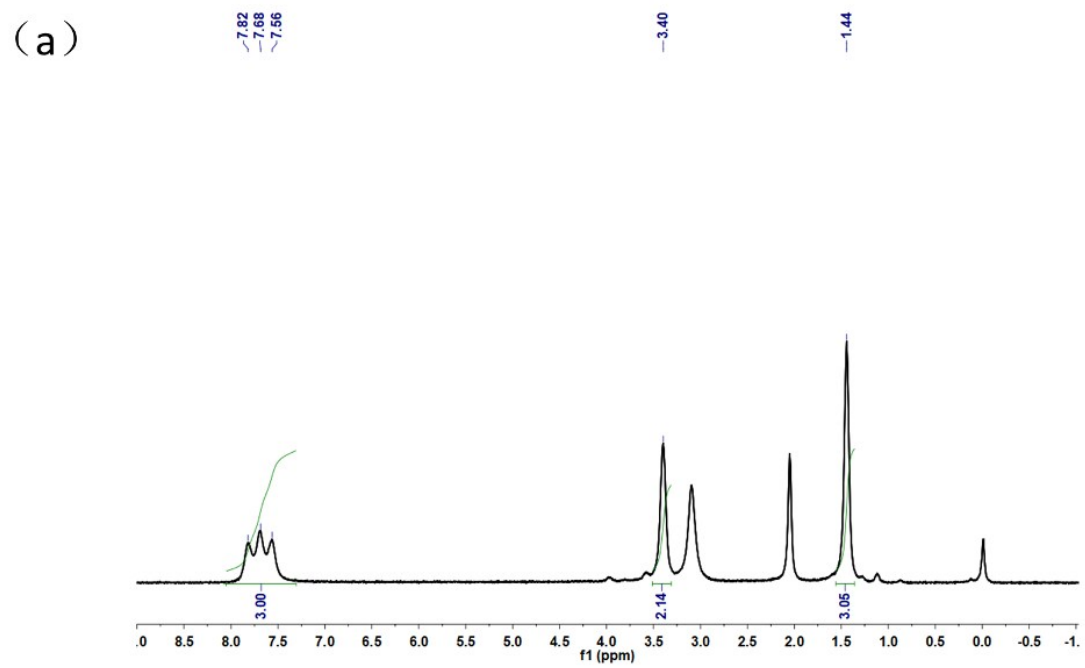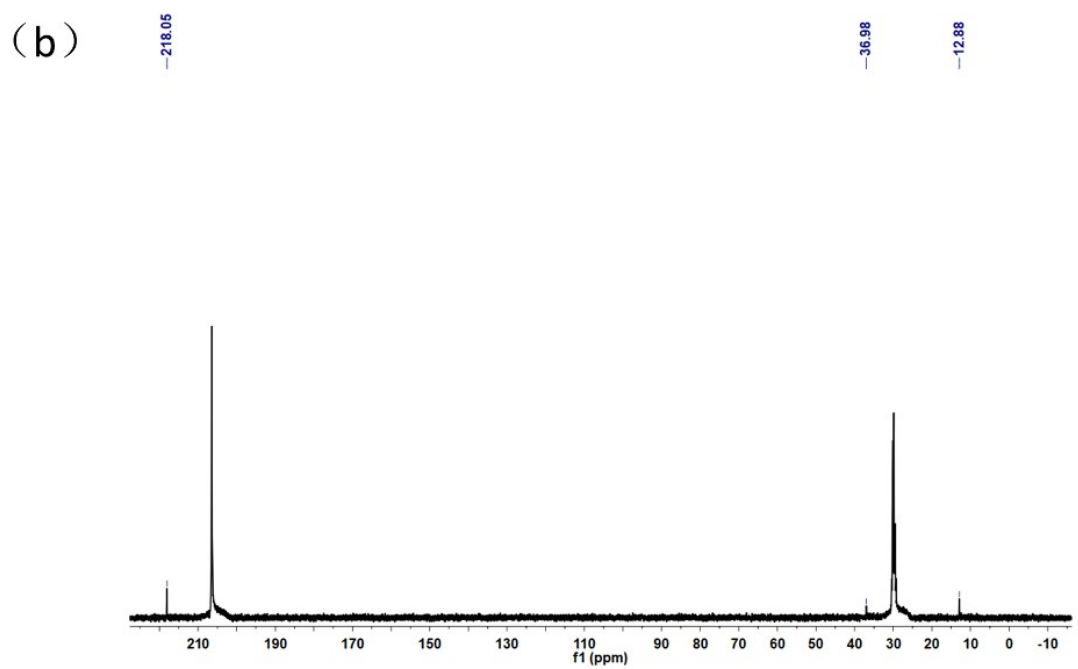

**Figure S5**  $^1\text{H}$  /  $^{13}\text{C}$  NMR spectra of salt **5** in acetone- $d^6$  solvent.



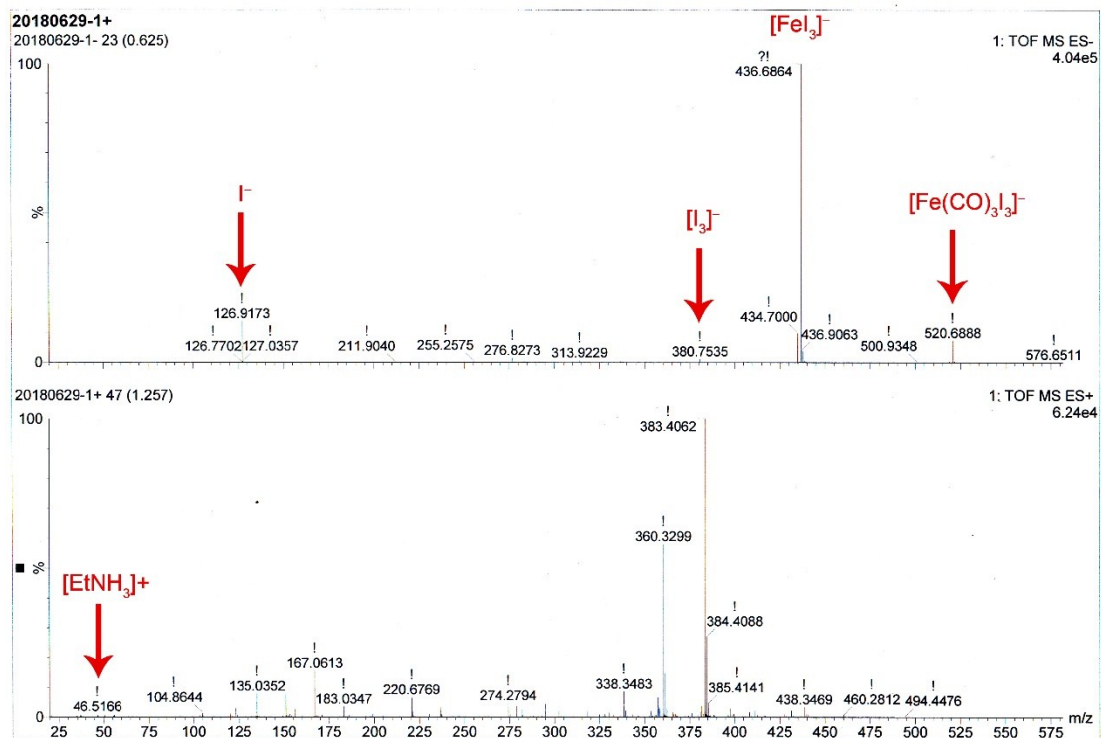

Figure S6 Mass spectra of salt 1 in MeOH.

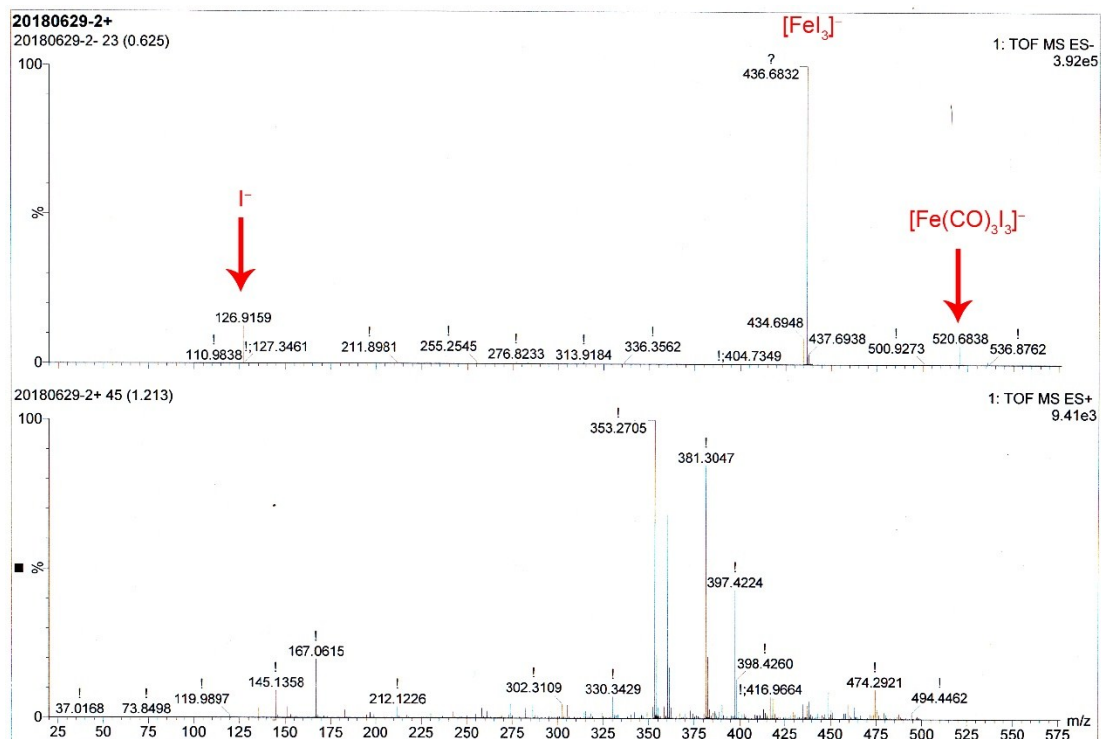

Figure S7 Mass spectra of salt 2 in MeOH

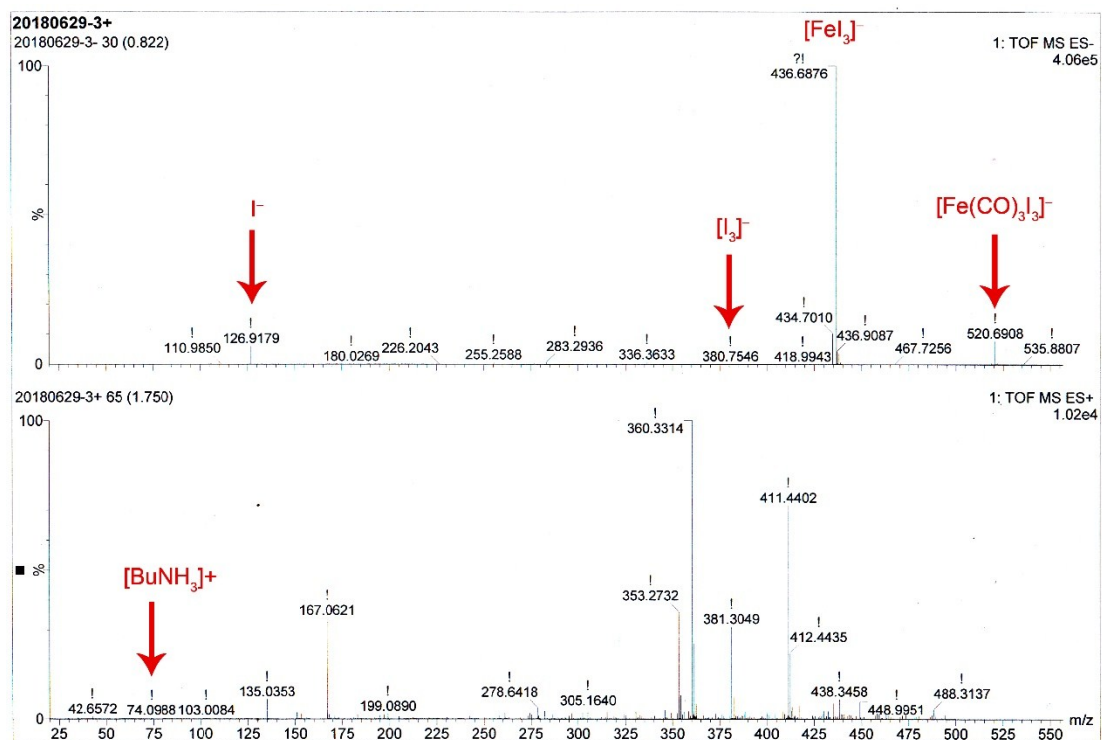

Figure S8 Mass spectra of salt 3 in MeOH.

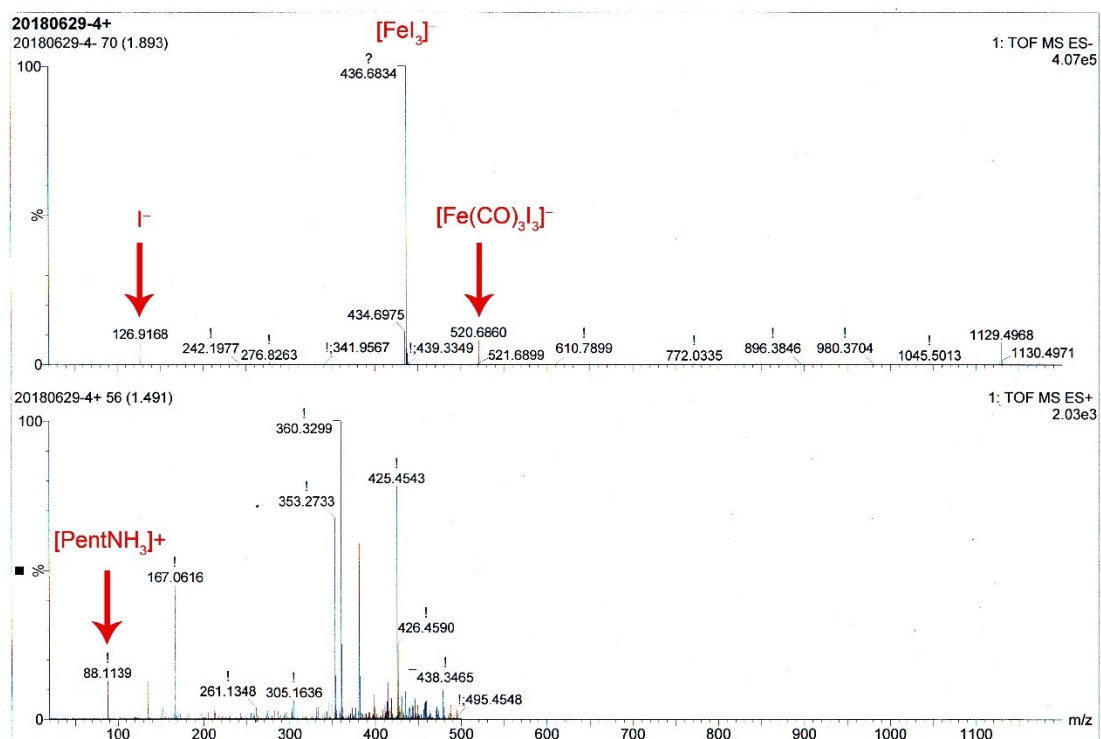

Figure S9 Mass spectra of salt 4 in MeOH.

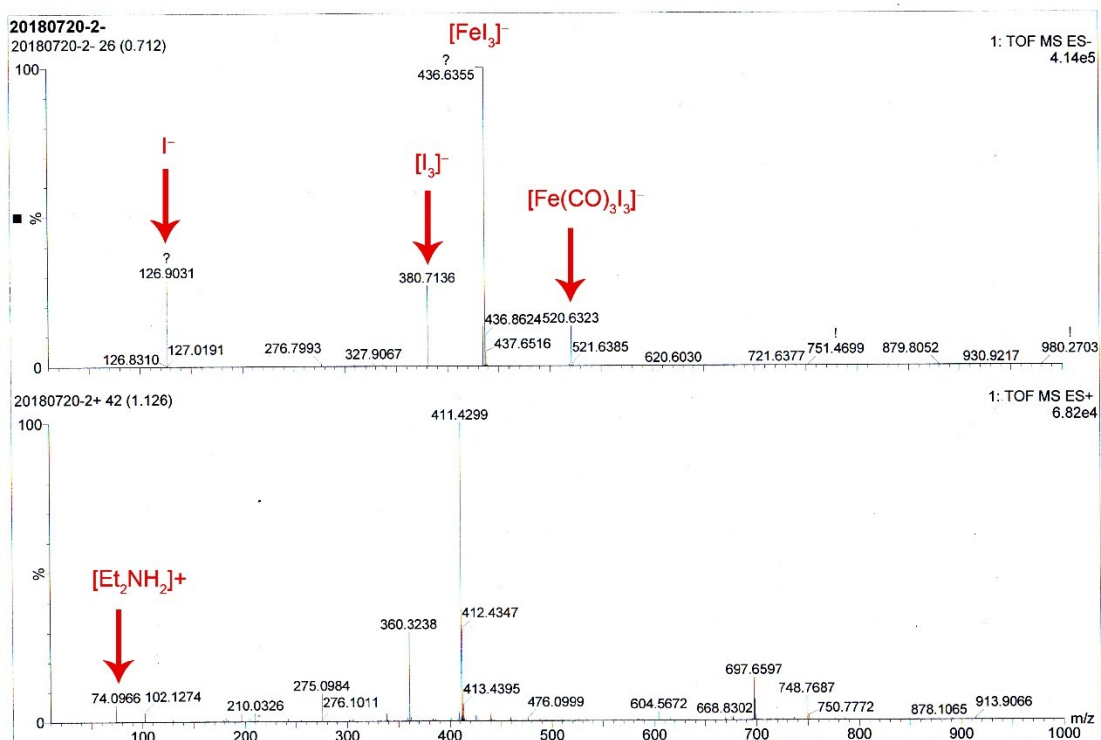

Figure S10 Mass spectra of salt **5** in MeOH.

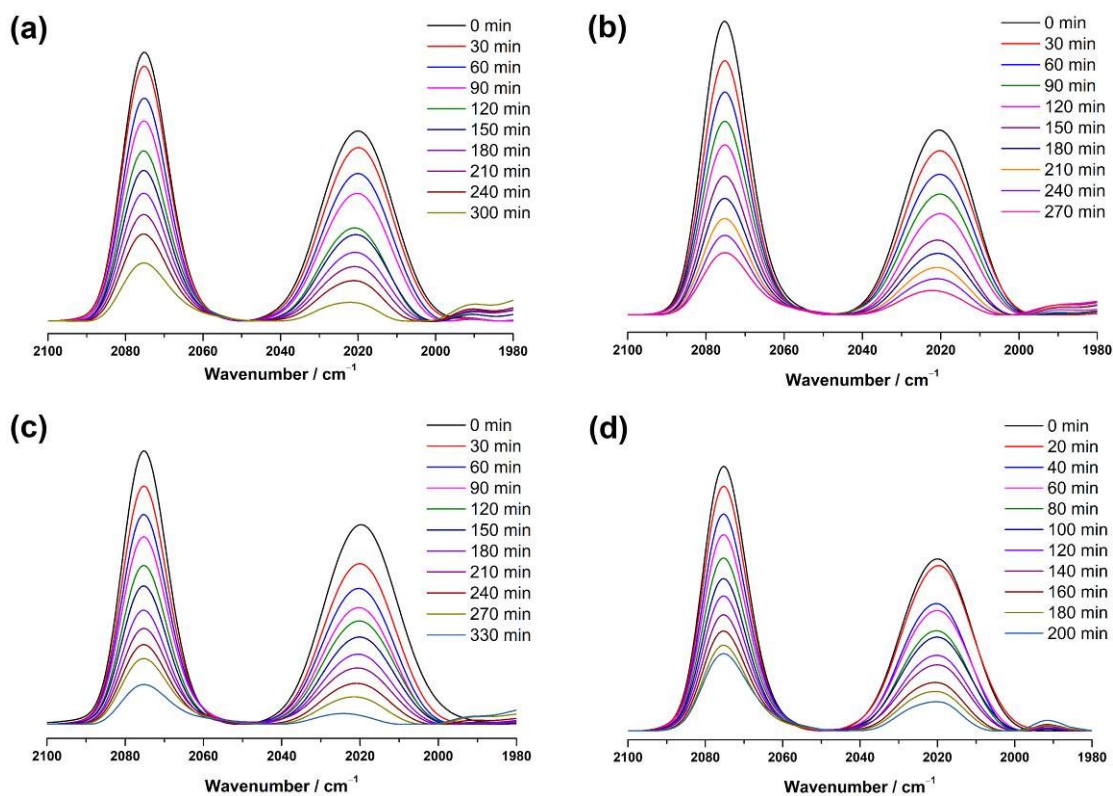

Figure S11 Infrared spectral variation during the CO-releasing process of salts **2** (a), **3** (b) and **4** (c), and **5** (d) in DMSO with a concentration of  $0.008 \text{ mol L}^{-1}$  at  $37 \text{ }^\circ\text{C}$  under an open atmosphere in dark, respectively.

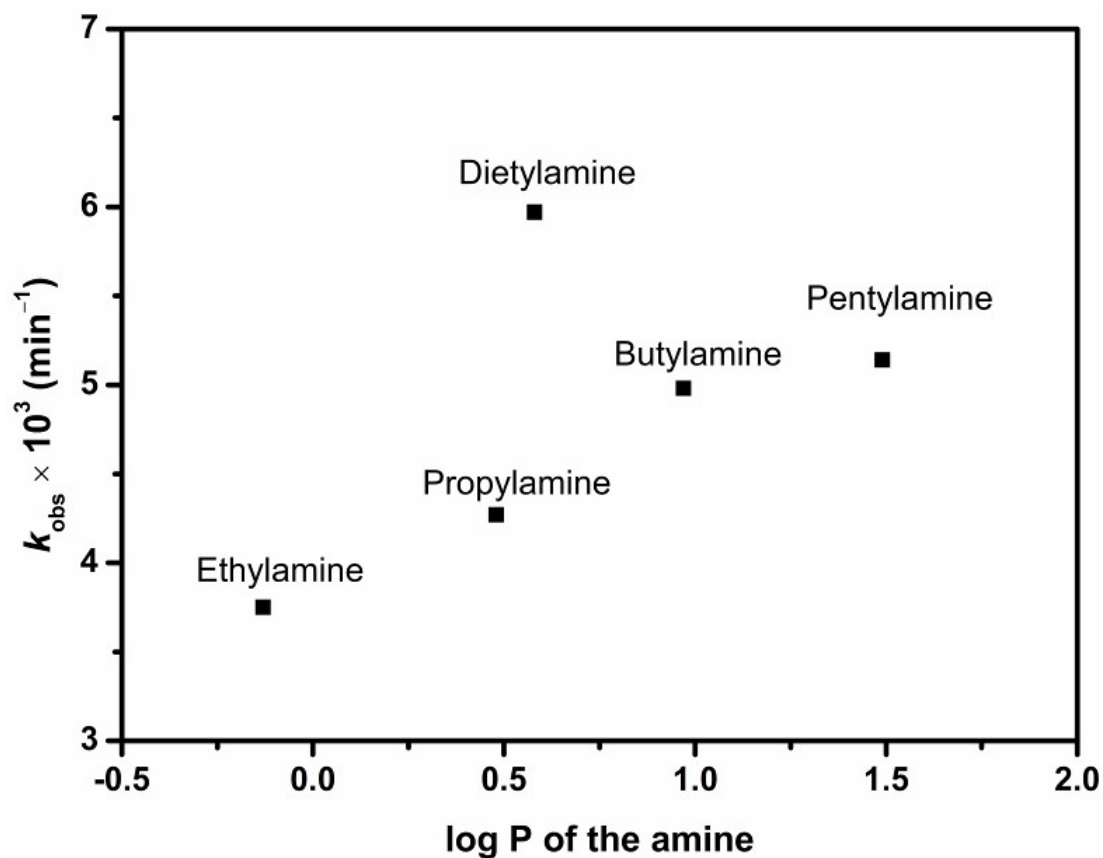

**Figure S12** Plot of rate constant ( $k_{\text{obs}}$ ) of the salts in DMSO against the logarithm of the octanol/water partition coefficient (log P) of the amines.

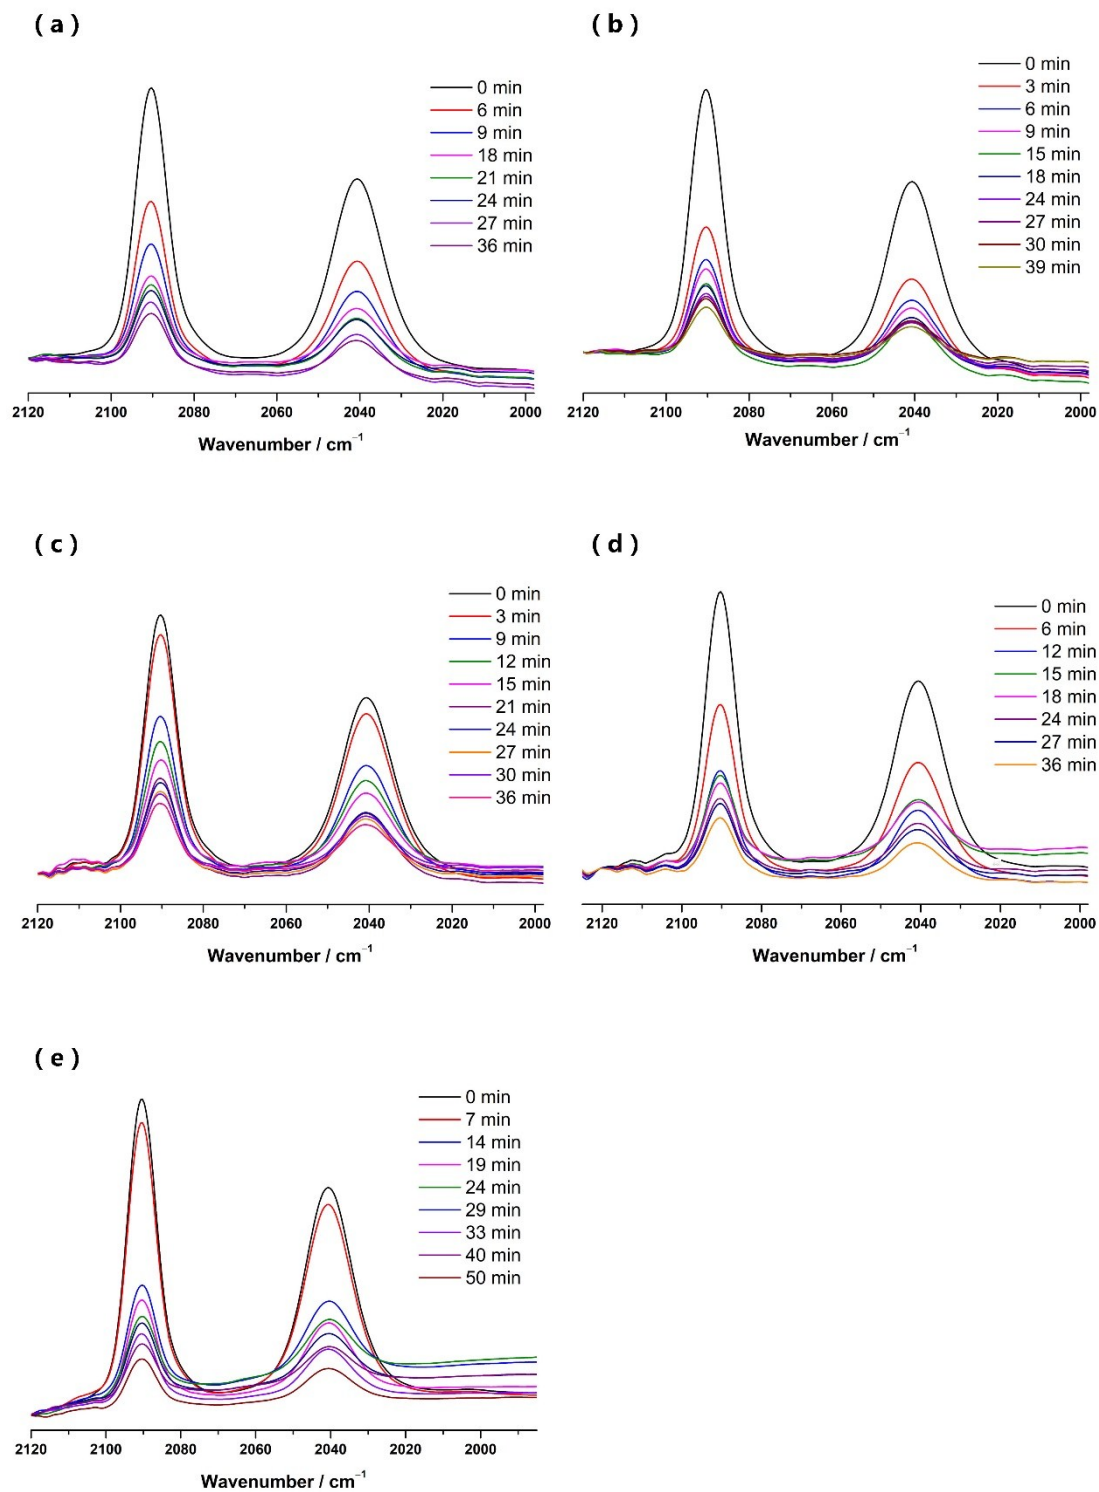

**Figure S13** Infrared spectral variation during the CO-releasing process of salts **1** (a), **2** (b), **3** (c), **4** (d), and **5** (e) in  $D_2O$  with a concentration of  $8.0 \text{ mmol L}^{-1}$  at  $37 \text{ }^\circ\text{C}$  under an open atmosphere in dark, respectively.

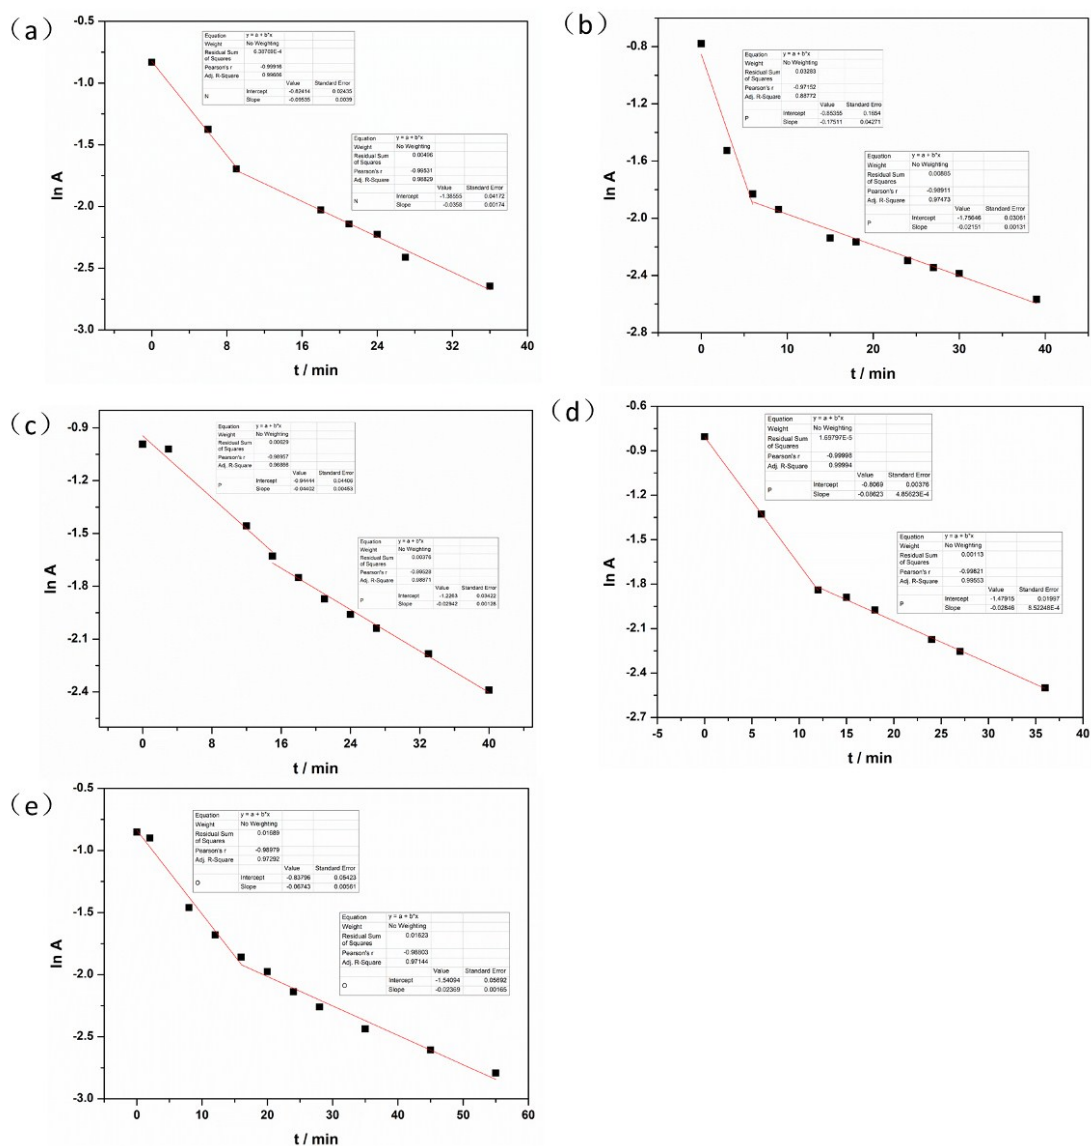

**Figure S14** Plots of the vibrational absorption ( $2090 \text{ cm}^{-1}$ ) of salts **1** (a), **2** (b), **3** (c), **4** (d), and **5** (e) against the process time in  $\text{D}_2\text{O}$  solvent (conditions:  $8.0 \text{ mmol L}^{-1}$  /  $37 \text{ }^\circ\text{C}$  / open air / dark).

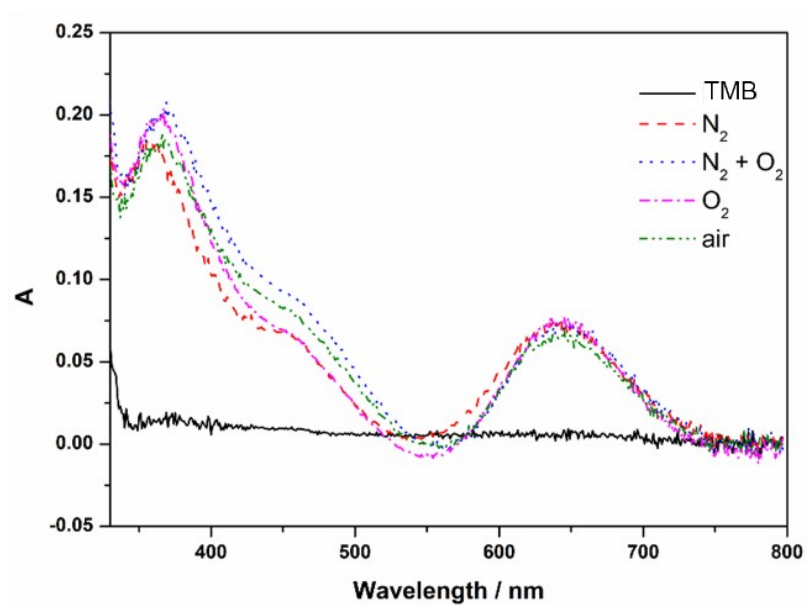

**Figure S15** UV-vis spectra of TMB in HOAc-NaOAc buffer (pH = 4.5) with the presence of salt **5** under different atmospheres.

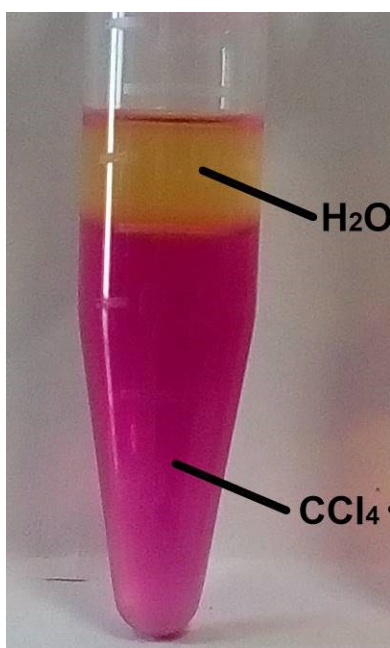

**Figure S16** A representative photo of an aqueous solution of salt **5** after adding of a CCl<sub>4</sub> organic solvent.

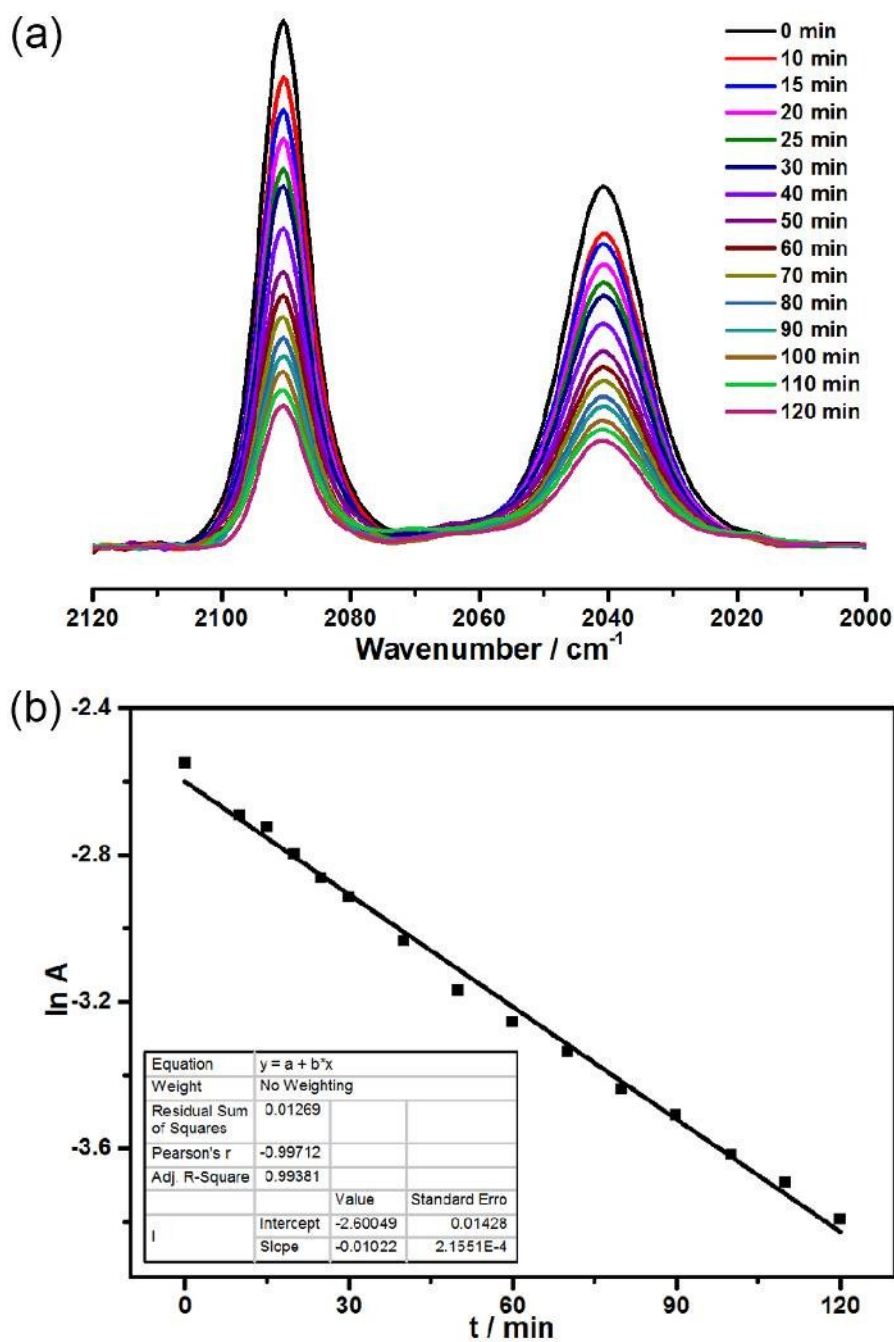

**Figure S17** (a) Infrared spectral variation during the CO-releasing process of salt **5** in the present of NaI ( $0.024 \text{ mol L}^{-1}$ ) and (b) plot of the vibrational absorption ( $2090 \text{ cm}^{-1}$ ) of salt **5** against the process time in  $\text{D}_2\text{O}$  solvent.



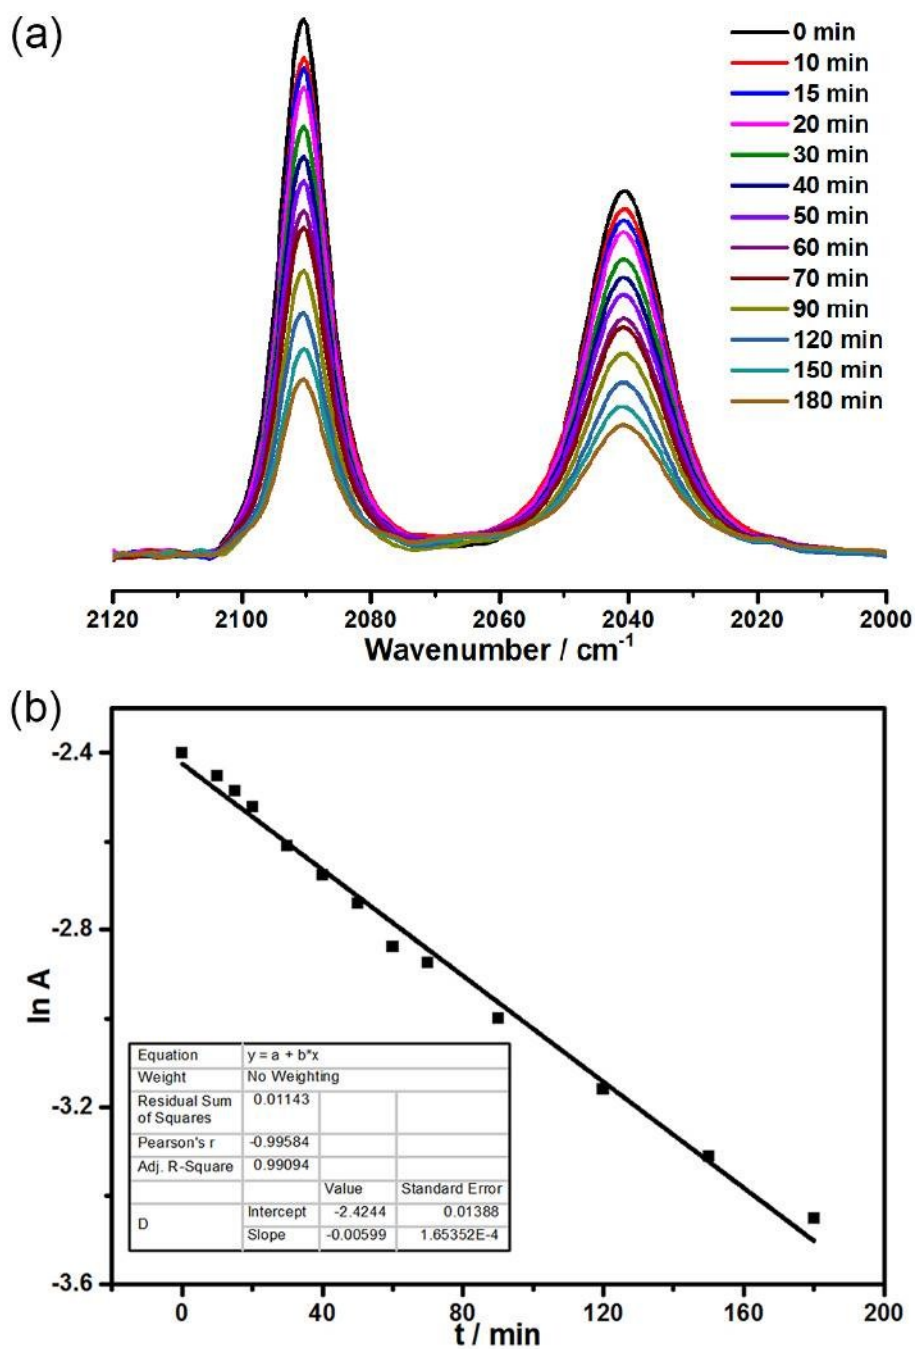

**Figure S18** (a) Infrared spectral variation during the CO-releasing process of salt **5** in the present of NaI ( $0.24 \text{ mol L}^{-1}$ ) and (b) plot of the vibrational absorption ( $2090 \text{ cm}^{-1}$ ) of salt **5** against the process time in  $\text{D}_2\text{O}$  solvent.

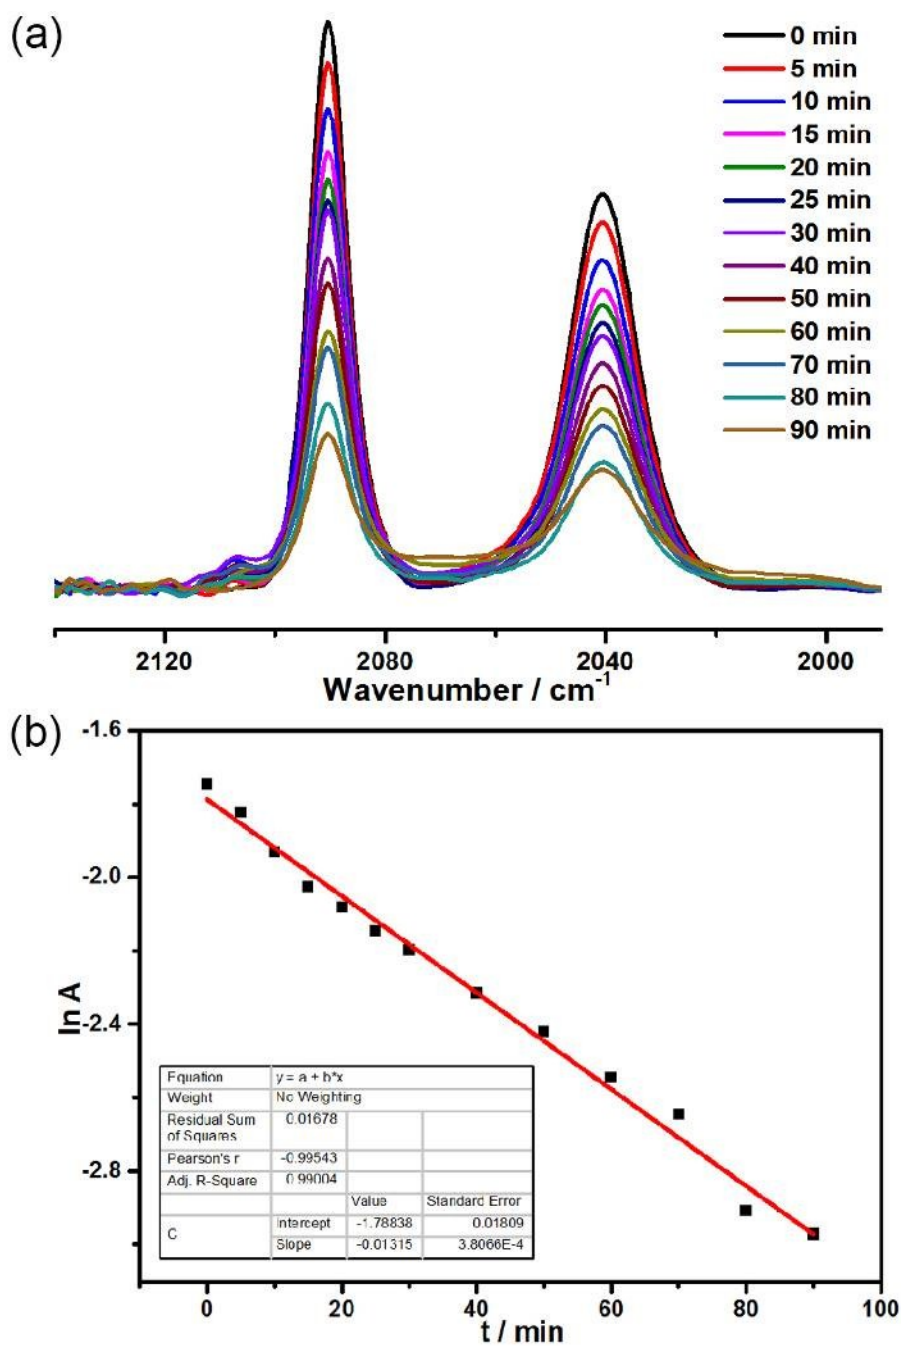

**Figure S19** (a) Infrared spectral variation during the CO-releasing process of salt **5** in the present of glucose ( $0.1 \text{ mol L}^{-1}$ ) and (b) plot of the vibrational absorption ( $2090 \text{ cm}^{-1}$ ) of salt **5** against the process time in  $\text{D}_2\text{O}$  solvent.

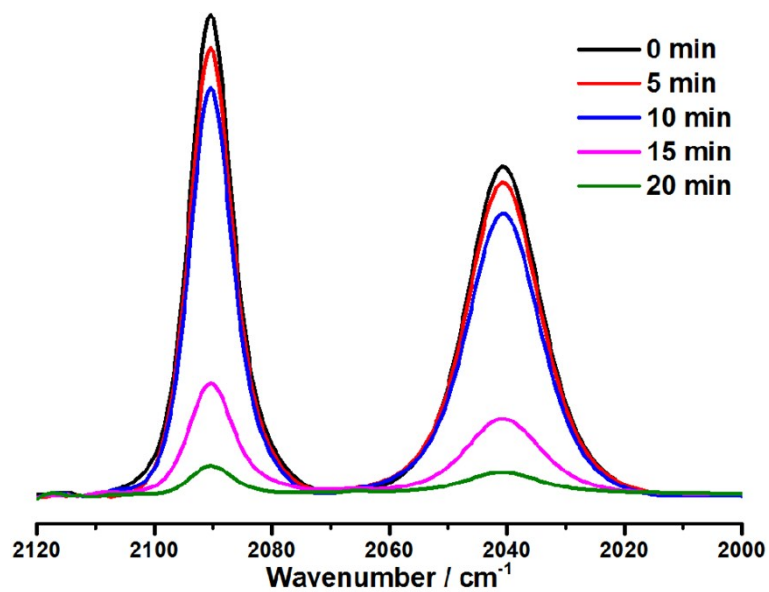

**Figure S20** Infrared spectral variation during the CO-releasing process of salt **5** in D<sub>2</sub>O solvent under N<sub>2</sub> atmosphere in dark.

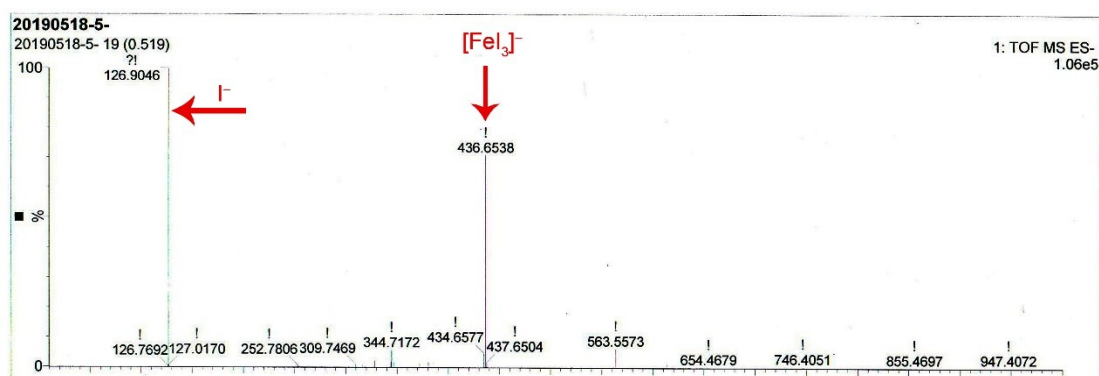

**Figure S21** Mass spectrum of i-CORM's solution of salt **5** in D<sub>2</sub>O solvent.

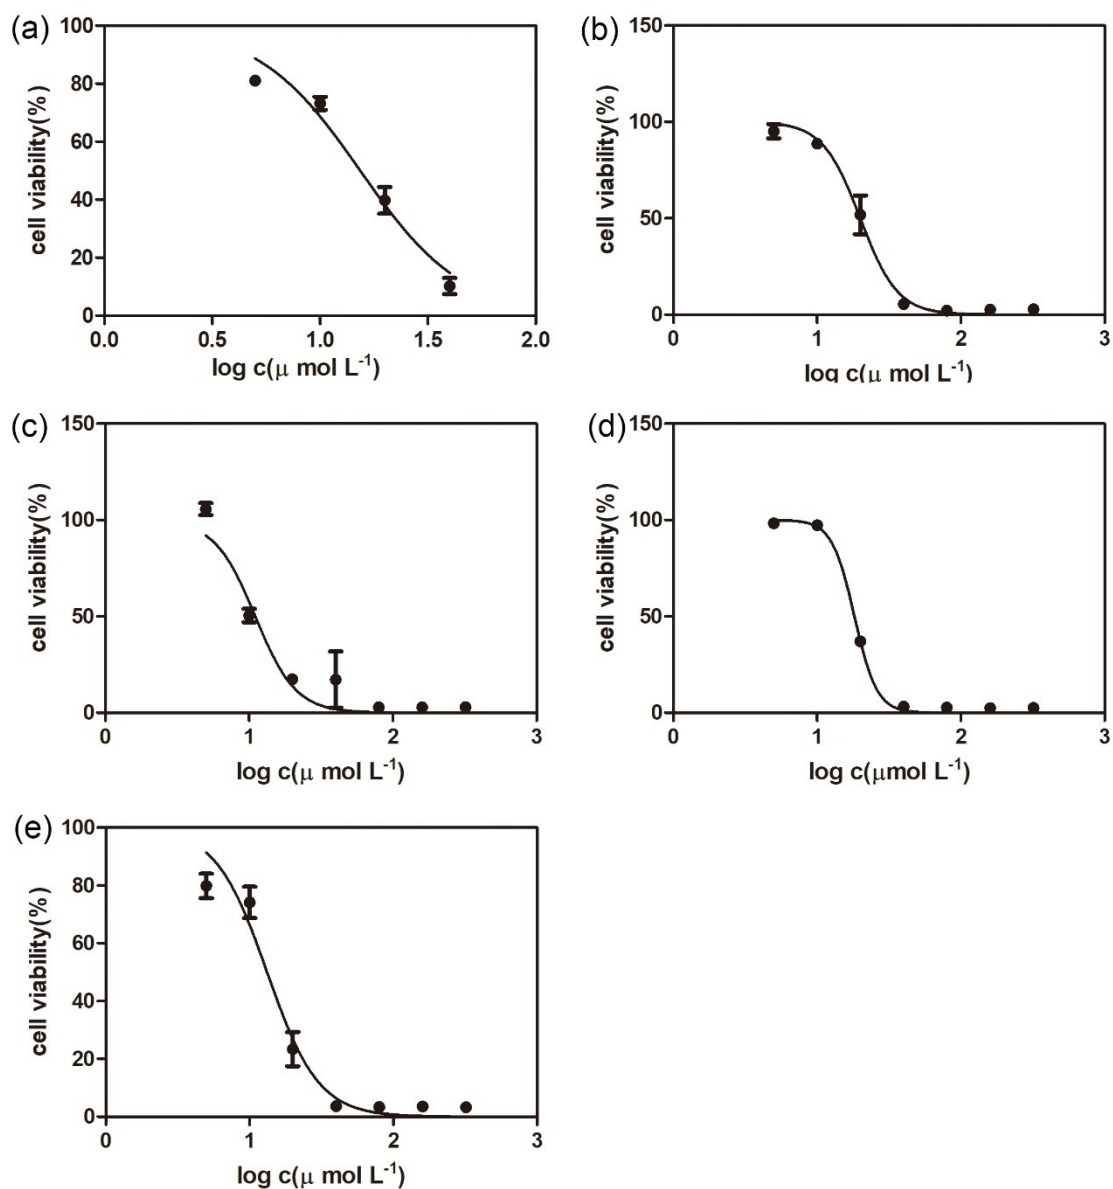

**Figure S22** nonlinear regression results of viabilities of RT112 against their responded Logarithm of salt's concentration ( $\log c$ ) to estimate  $IC_{50}$  values of **1** (a), **2** (b), **3**(c), **4** (d) and **5** (e) in 24 h, respectively.

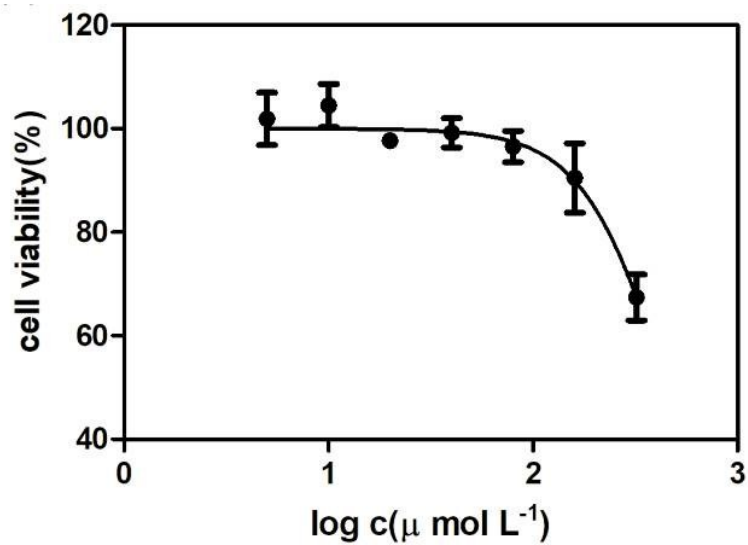

**Figure S23** nonlinear regression results of viabilities of RT112 against their responded Logarithm of the i-CORMs' concentration ( $\log c$ ) derived from salt **5** to estimate its  $IC_{50}$  value in 24 h.

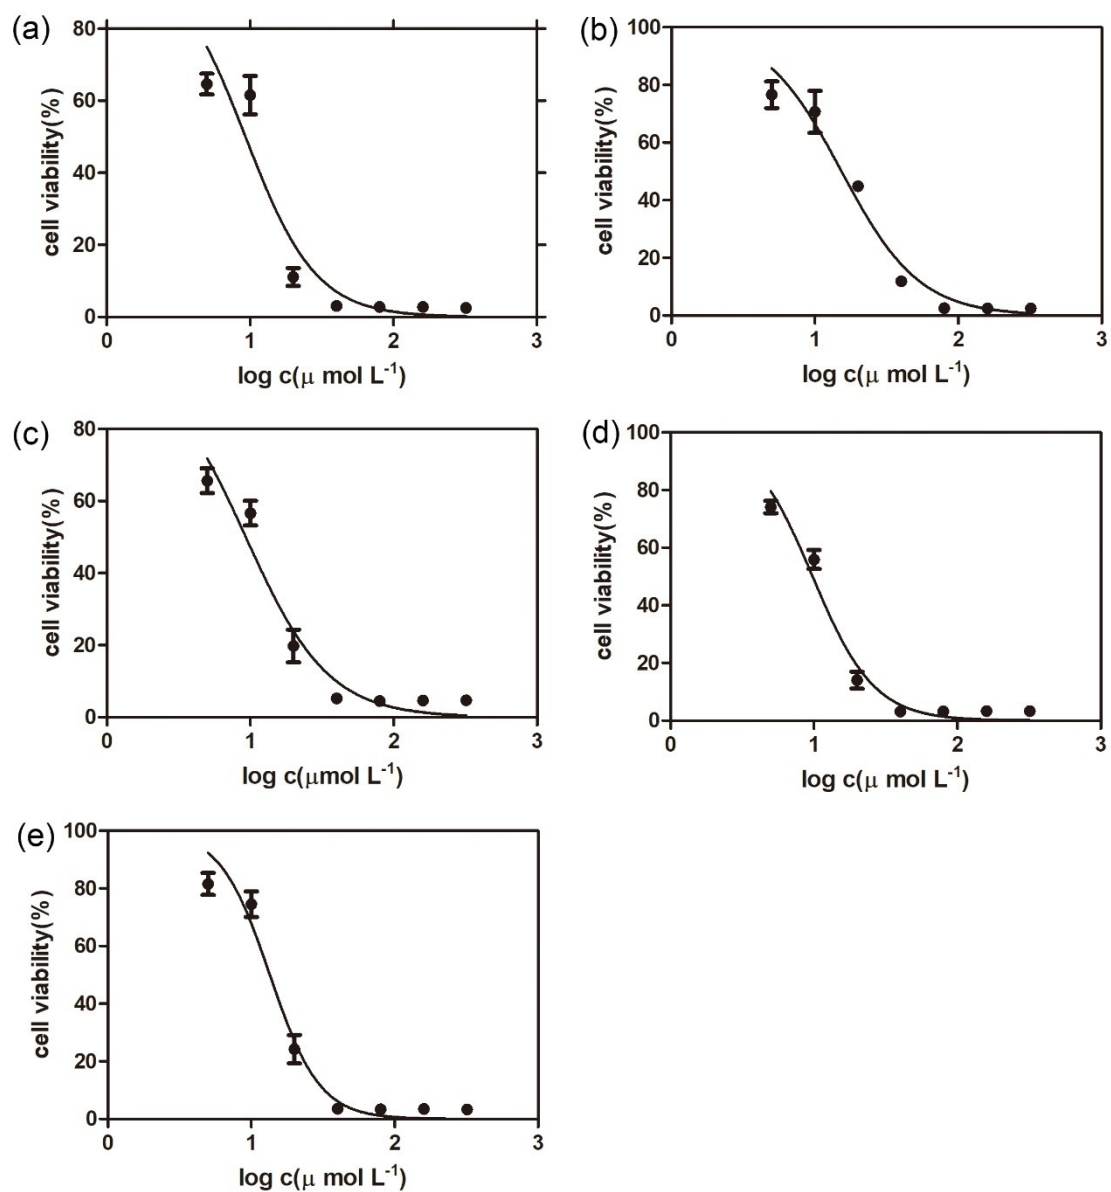

**Figure S24** nonlinear regression results of viabilities of SV-HUC-1 against their responded Logarithm of salt's concentration ( $\log c$ ) to estimate  $IC_{50}$  values of **1** (a), **2**(b), **3** (c), **4** (d) and **5** (e) in 24 h, respectively.

**Table S1** Crystal data and structural refinements for salts **1–4**.

|                                              | <b>1</b>                                                       | <b>2</b>                                                        | <b>3</b>                                                        | <b>4</b>                                                        |
|----------------------------------------------|----------------------------------------------------------------|-----------------------------------------------------------------|-----------------------------------------------------------------|-----------------------------------------------------------------|
| CCDC no.                                     | 1963446                                                        | 1963447                                                         | 1963448                                                         | 1963449                                                         |
| Formula                                      | C <sub>5</sub> H <sub>8</sub> FeI <sub>3</sub> NO <sub>3</sub> | C <sub>6</sub> H <sub>10</sub> FeI <sub>3</sub> NO <sub>3</sub> | C <sub>7</sub> H <sub>12</sub> FeI <sub>3</sub> NO <sub>3</sub> | C <sub>8</sub> H <sub>14</sub> FeI <sub>3</sub> NO <sub>3</sub> |
| Formula weight                               | 566.67                                                         | 580.70                                                          | 594.73                                                          | 608.75                                                          |
| Crystal system                               | monoclinic                                                     | monoclinic                                                      | monoclinic                                                      | triclinic                                                       |
| Space group                                  | P2 <sub>1</sub> /c                                             | P2 <sub>1</sub> /c                                              | P2 <sub>1</sub> /m                                              | P-1                                                             |
| a/Å                                          | 9.2096(8)                                                      | 12.0358(10)                                                     | 8.2405(9)                                                       | 8.092(2)                                                        |
| b/Å                                          | 14.5251(12)                                                    | 7.9704(3)                                                       | 8.0958(9)                                                       | 8.2197(8)                                                       |
| c/Å                                          | 10.4460(9)                                                     | 16.4638(10)                                                     | 12.6129(12)                                                     | 13.3496(16)                                                     |
| α/°                                          | 90                                                             | 90                                                              | 90                                                              | 100.214(9)                                                      |
| β/°                                          | 91.739(7)                                                      | 108.505(8)                                                      | 106.571(10)                                                     | 94.639(16)                                                      |
| γ/°                                          | 90                                                             | 90                                                              | 90                                                              | 92.457(16)                                                      |
| Volume/Å <sup>3</sup>                        | 1396.7(2)                                                      | 1497.71(18)                                                     | 806.50(15)                                                      | 869.5(3)                                                        |
| Z                                            | 4                                                              | 4                                                               | 2                                                               | 2                                                               |
| F(000)                                       | 1016.0                                                         | 1048.0                                                          | 540.0                                                           | 556.0                                                           |
| 2θ/°                                         | 5.61 to 59.09                                                  | 5.738 to<br>58.634                                              | 6.74 to 49.992                                                  | 5.698 to<br>49.994                                              |
| Reflections<br>collected                     | 5969                                                           | 12199                                                           | 4931                                                            | 3010                                                            |
| Independent<br>reflections                   | 3229                                                           | 3575                                                            | 1515                                                            | 3010                                                            |
| Goodness-of-fit<br>on F <sup>2</sup>         | 1.030                                                          | 1.032                                                           | 1.040                                                           | 1.046                                                           |
| R <sub>I</sub> , wR <sub>2</sub> (I ≥ 2σ(I)) | 0.0631, 0.1412                                                 | 0.0596, 0.0984                                                  | 0.0572, 0.1447                                                  | 0.1170, 0.2920                                                  |
| R <sub>I</sub> , wR <sub>2</sub> (all data)  | 0.1131, 0.1687                                                 | 0.1065, 0.1177                                                  | 0.0890, 0.1711                                                  | 0.1625, 0.3462                                                  |

**Table S2** Selected bond lengths (Å) and angles (°) for salts **1–4**.

| salt      | <b>1</b>   | <b>2</b>   | <b>3</b>   | <b>4</b>  |
|-----------|------------|------------|------------|-----------|
| Fe1-C1    | 1.779(16)  | 1.790(12)  | 1.758(18)  | 1.78(2)   |
| Fe1-C2    | 1.798(16)  | 1.772(12)  | 1.762(14)  | 1.84(3)   |
| Fe1-C3    | 1.803(15)  | 1.802(13)  | -          | 1.71(4)   |
| C1-O1     | 1.106(16)  | 1.113(12)  | 1.108(17)  | 1.08(3)   |
| C2-O2     | 1.130(16)  | 1.139(12)  | 1.139(14)  | 1.07(3)   |
| C3-O3     | 1.134(16)  | 1.082(12)  | -          | 1.20(4)   |
| Fe1-I1    | 2.6637(19) | 2.6431(15) | 2.6482(19) | 2.648(4)  |
| Fe1-I2    | 2.6531(19) | 2.6425(16) | 2.595(8)   | 2.659(4)  |
| Fe1-I3    | 2.650(2)   | 2.6580(15) | -          | 2.657(4)  |
| Fe1-C1-O1 | 178.2(15)  | 178.0(11)  | 175.4(19)  | 176(3)    |
| C1-Fe1-C2 | 94.2(6)    | 93.7(5)    | 93.6(6)    | 93.3(12)  |
| C1-Fe1-I1 | 179.6(4)   | 86.1(4)    | 179.0(6)   | 86.5(10)  |
| I1-Fe1-I2 | 93.00(6)   | 93.70(5)   | 94.8(3)    | 93.61(13) |
